# Supplementary material for: CD8 and CD4 T Cell Populations in Human Kidneys
Source: PubMed Central journal article supplement (PMC7912772; doi:10.3390/cells10020288), 2021-02-01
Supplement: cells-10-00288-s001.pdf [file cells-10-00288-s001.pdf]

## Table of contents: Supplemental Materials

| Title                                                                                                                                     | relates to main figures |
|-------------------------------------------------------------------------------------------------------------------------------------------|-------------------------|
| <b>Table S1</b> Monoclonal antibodies used for phenotyping.                                                                               | 1–5                     |
| <b>Table S2</b> Monoclonal antibodies used for stimulation assay.                                                                         | 6                       |
| <b>Figure S1</b> Gating strategy T cell phenotyping.                                                                                      | 1–5                     |
| <b>Figure S2</b> Gating strategy polyfunctional assay.                                                                                    | 6                       |
| <b>Figure S3</b> CD3 cell counts.                                                                                                         | 1                       |
| <b>Figure S4</b> Phenotype of CD8 and CD4 T cells derived from PB and healthy kidney.                                                     | 1 and 2                 |
| <b>Figure S5</b> CD27/CD45RA/CCR7/CD28-expression profile and phenotype of CD8 and CD4 T cells from healthy kidney compared to TX kidney. | 3                       |
| <b>Figure S6</b> Phenotype of CD69/CD103 based subsets in CD8 and CD4 T cells derived from kidney.                                        | 4                       |
| <b>Figure S7</b> Cytokines produced by healthy kidney compared to TX kidney derived CD8 and CD4 T cells.                                  | 7                       |

## Abbreviations and acronyms

|                |                                                                       |
|----------------|-----------------------------------------------------------------------|
| BKPyV          | polyomavirus BK                                                       |
| ADPKD          | autosomal dominant polycystic kidney disease                          |
| ATN            | acute tubular necrosis                                                |
| CMV            | cytomegalovirus                                                       |
| FSGS           | focal segmental glomerulosclerosis                                    |
| GM-CSF         | granulocyte-macrophage colony stimulating factor                      |
| HB             | heartbeating                                                          |
| Hobit          | homolog of Blimp1 in T cells                                          |
| IFN $\gamma$   | interferon- $\gamma$                                                  |
| IgAN           | nephropathy                                                           |
| IL-17A         | interleukin-17                                                        |
| IL-2           | interleukin-2                                                         |
| IL-7R $\alpha$ | $\alpha$ -chain of interleukin receptor 7                             |
| KLF2           | Krüppel-like Factor 2                                                 |
| KLRG1          | Killer cell lectin-like receptor subfamily G member 1                 |
| LTAG           | large T antigen                                                       |
| MAIT           | mucosa-associated invariant T cells                                   |
| MNC            | Mononuclear cells                                                     |
| NHB            | non-heartbeating                                                      |
| PB             | Peripheral blood                                                      |
| RTRs           | renal transplant recipients                                           |
| S1PR1          | Sphingosine-1-phosphate receptor 1                                    |
| SP1            | sphingosine 1-phosphate                                               |
| TCM            | central-memory T cells (CD45RA-CCR7+CD28+CD27+)                       |
| TEM1           | effector-memory T cells subset 1 (CD45RA-CCR7-CD28+CD27+)             |
| TEM2           | effector-memory T cells subset 2 (CD45RA-CCR7-CD28+CD27-)             |
| TEM3           | effector-memory T cells subset 3 (CD45RA-CCR7-CD28-CD27+)             |
| TEM4           | effector-memory T cells subset 4 (CD45RA-CCR7-CD28-CD27-)             |
| TEMRA          | effector-memory T cells re-expressing CD45RA (CD45RA+CCR7-CD28-CD27-) |
| TN             | naive T cells (CD45RA+CCR7+CD28+CD27+)                                |
| TNF $\alpha$   | tumour necrosis factor $\alpha$                                       |
| TRM            | tissue resident memory T cells                                        |
| TX             | transplantation                                                       |
| VP1            | virion protein 1                                                      |

**Table S1. Monoclonal antibodies used for phenotyping.**

| <b>anti</b>                             | <b>clone</b> | <b>fluorochrome</b> | <b>staining</b> | <b>manufacturer</b>             |
|-----------------------------------------|--------------|---------------------|-----------------|---------------------------------|
| <b>CD3</b>                              | UCHT1        | V500                | surface         | BD Bioscience <sup>1</sup>      |
| <b>CD4</b>                              | SK3          | BUV563              | surface         | BD Bioscience <sup>1</sup>      |
| <b>CD8</b>                              | RPA-T8       | BV785               | surface         | Sony Biotechnology <sup>2</sup> |
| <b>CD27</b>                             | M-T271       | APC                 | surface         | BD Bioscience <sup>1</sup>      |
| <b>CD28</b>                             | CD28.2       | APC-R700            | surface         | BD Bioscience <sup>1</sup>      |
| <b>CD45</b>                             | HI30         | PerCP-eFluor 710    | surface         | eBioscience <sup>3</sup>        |
| <b>CD45RA</b>                           | HI100        | BV650               | surface         | BD Bioscience <sup>1</sup>      |
| <b>CD69</b>                             | FN50         | APC-Fire 750        | surface         | Biologend <sup>4</sup>          |
| <b>CD103</b>                            | Ber-ACT8     | BUV395              | surface         | BD Bioscience <sup>1</sup>      |
| <b>CD103</b>                            | Ber-ACT8     | BV711               | surface         | BD Bioscience <sup>1</sup>      |
| <b>CD127 (IL-7R<math>\alpha</math>)</b> | eBioRDR5     | PE-Cy7              | surface         | eBioscience <sup>3</sup>        |
| <b>CD183 (CXCR3)</b>                    | REA232       | PE-Vio 615          | surface         | Miltenyi Biotec <sup>5</sup>    |
| <b>CD186 (CXCR6)</b>                    | K041E5       | PE-Cy7              | surface         | Biologend <sup>4</sup>          |
| <b>CD197 (CCR7)</b>                     | 2-L1-A       | PE-CF594            | surface         | BD Bioscience <sup>1</sup>      |
| <b>KLRG1</b>                            | 3F12F2       | AF488               | surface         | eBioscience <sup>3</sup>        |
| <b>ki-67</b>                            | Ki-67        | BV650               | intracellulair  | BD Bioscience <sup>1</sup>      |
| <b>granzyme B</b>                       | GB11         | AF700               | intracellulair  | BD Bioscience <sup>1</sup>      |
| <b>T-bet</b>                            | 4B10         | BV711               | intracellulair  | Biologend <sup>4</sup>          |
| <b>eomes</b>                            | WD1928       | eFluor660           | intracellulair  | eBioscience <sup>3</sup>        |

<sup>1</sup>Franklin Lakes, NJ, USA <sup>2</sup>Weybridge, UK <sup>3</sup>Thermo Fisher Scientific, San Diego, CA, USA <sup>4</sup>San Diego, CA, USA <sup>5</sup>Bergisch Gladbach, Germany

**Table S2. Monoclonal antibodies used for stimulation assay.**

| anti                          | clone      | fluorochrome     | staining      | manufacturer                    |
|-------------------------------|------------|------------------|---------------|---------------------------------|
| <b>CD3</b>                    | SK7        | PerCP-eFluor 710 | surface       | eBioscience Inc. <sup>2</sup>   |
| <b>CD4</b>                    | RPA-T4     | BV711            | surface       | BioLegend <sup>4</sup>          |
| <b>CD8</b>                    | RPA-T8     | BV785            | surface       | Sony Biotechnology <sup>3</sup> |
| <b>CD103</b>                  | Ber-ACT8   | BB515            | surface       | BD Bioscience <sup>1</sup>      |
| <b>CD161</b>                  | HP-3G10    | PE-Cy7           | surface       | BioLegend <sup>4</sup>          |
| <b>GM-CSF</b>                 | BVD2-21C11 | PE-Dazzle        | intracellular | BioLegend <sup>4</sup>          |
| <b>IFN<math>\gamma</math></b> | B27        | BUV 395          | intracellular | BD Bioscience <sup>1</sup>      |
| <b>IL-2</b>                   | MQ1-17H12  | BV510            | intracellular | BioLegend <sup>4</sup>          |
| <b>IL-17A</b>                 | N49-653    | BV650            | intracellular | BD Bioscience <sup>1</sup>      |
| <b>TNF<math>\alpha</math></b> | Mab11      | AF700            | intracellular | BD Bioscience <sup>1</sup>      |

<sup>1</sup>Franklin Lakes, NJ, USA <sup>2</sup>Thermo Fisher Scientific, San Diego, CA, USA <sup>3</sup>Weybridge, UK <sup>4</sup>San Diego, CA, USA

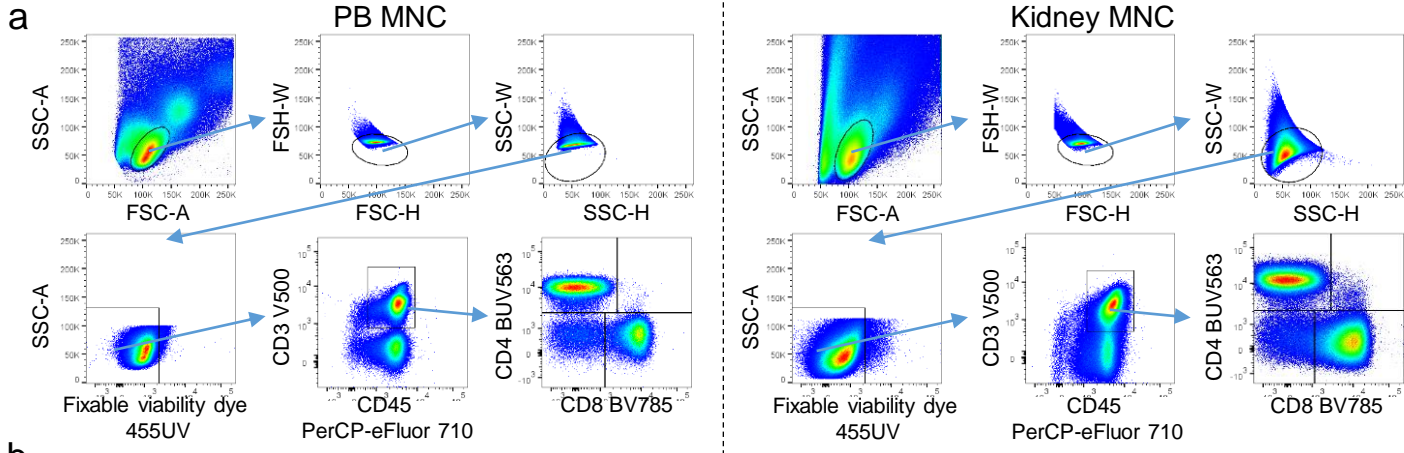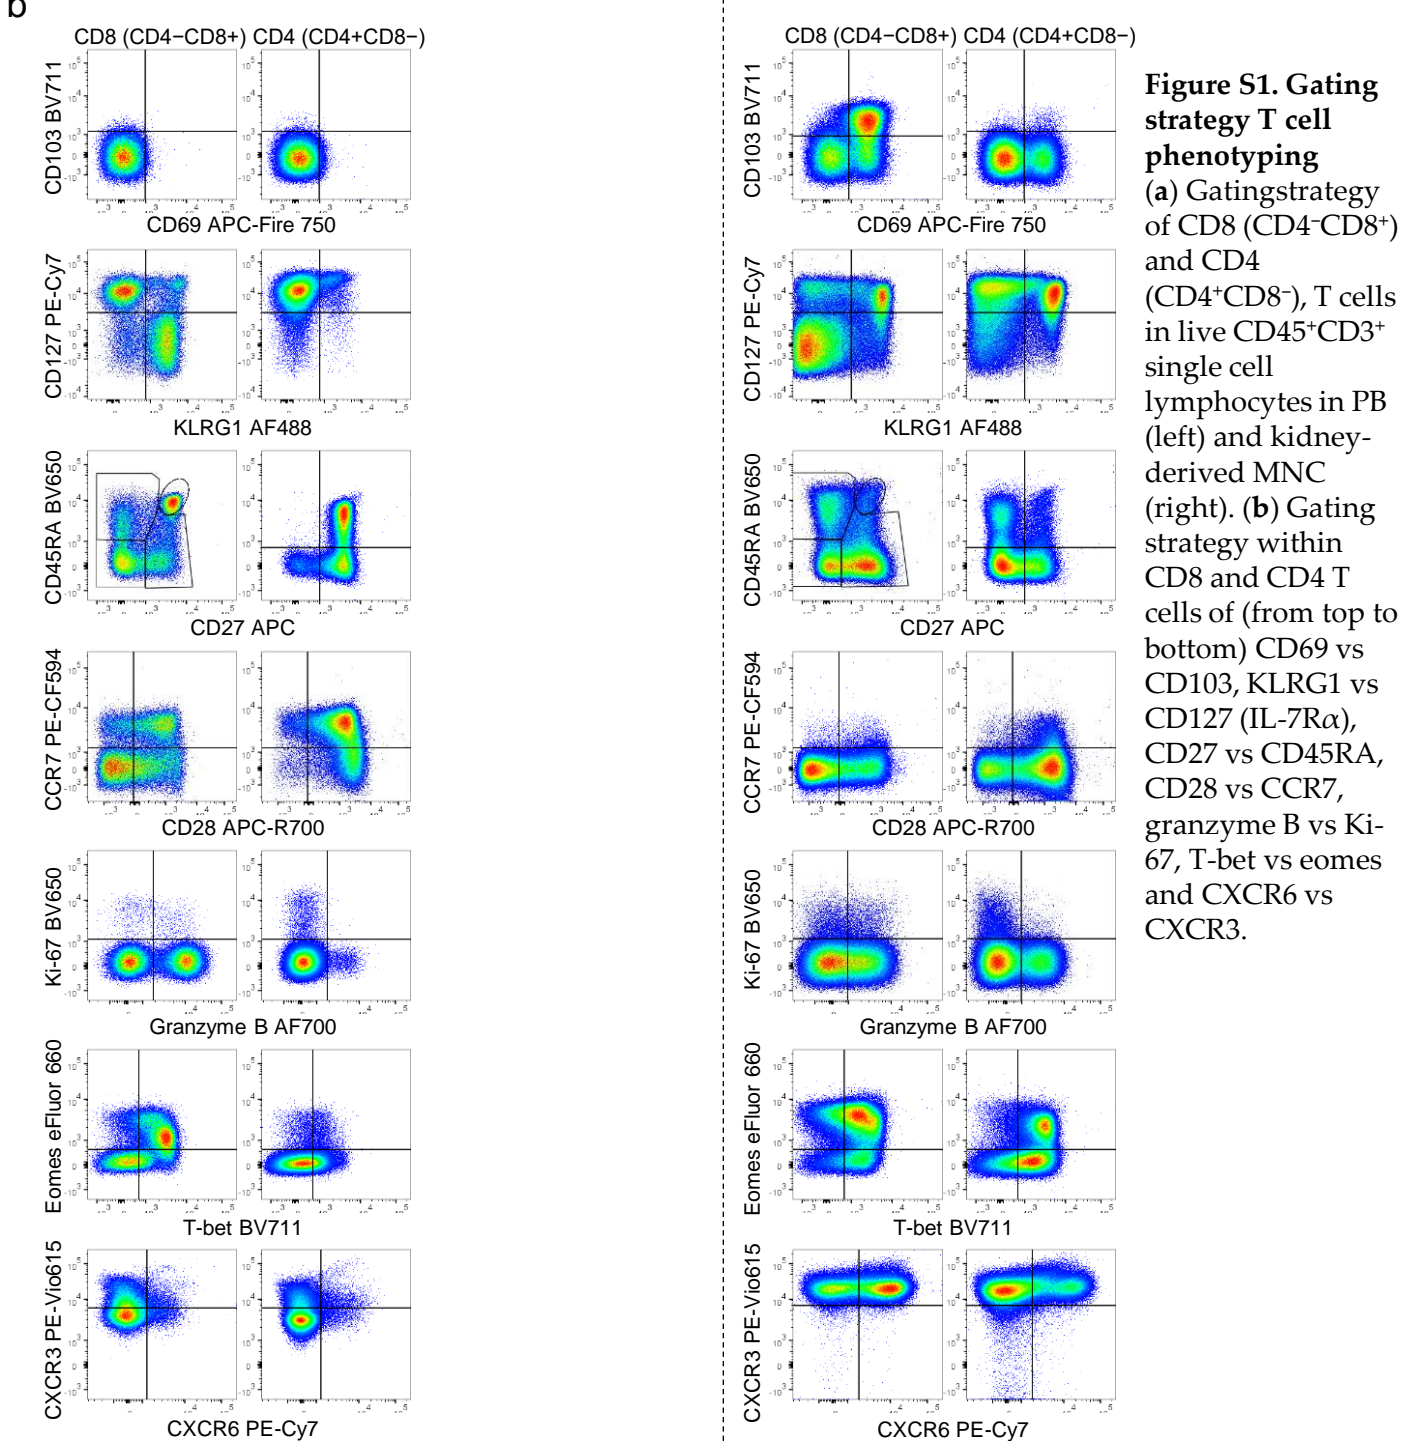

**Figure S1. Gating strategy T cell phenotyping**  
**(a)** Gating strategy of CD8 (CD4-CD8+) and CD4 (CD4+CD8-), T cells in live CD45+CD3+ single cell lymphocytes in PB (left) and kidney-derived MNC (right). **(b)** Gating strategy within CD8 and CD4 T cells of (from top to bottom) CD69 vs CD103, KLRG1 vs CD127 (IL-7R $\alpha$ ), CD27 vs CD45RA, CD28 vs CCR7, granzyme B vs Ki-67, T-bet vs eomes and CXCR6 vs CXCR3.

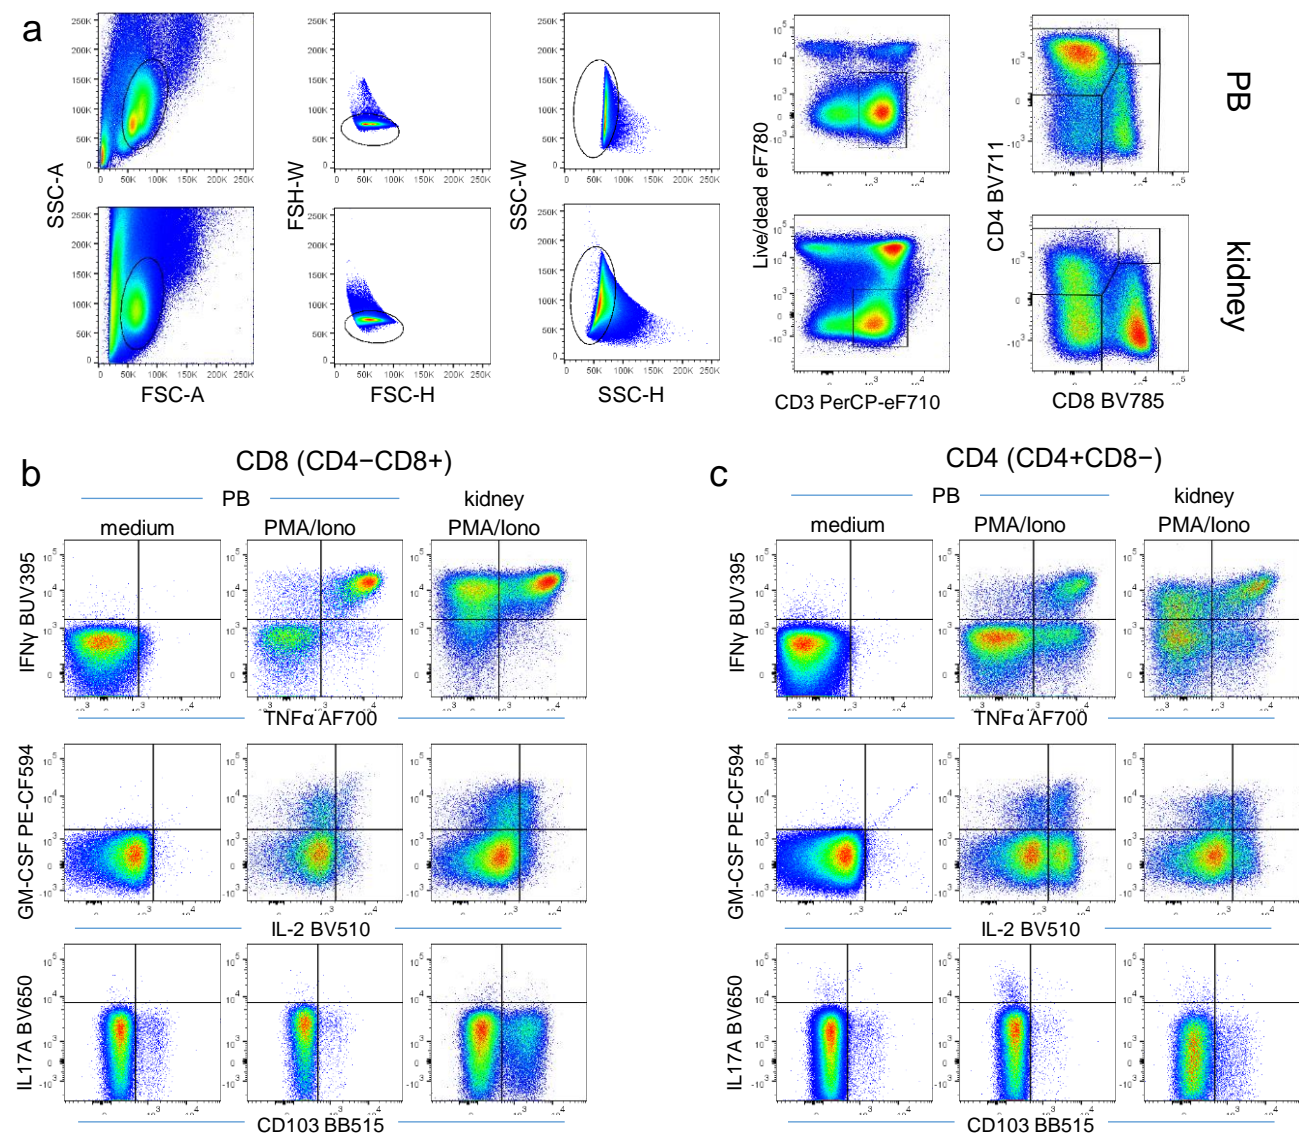

**Figure S2. Gating strategy polyfunctional assay**

(a) Gating strategy of CD8 (CD4<sup>-</sup>CD8<sup>+</sup>) and CD4 (CD4<sup>+</sup>CD8<sup>-</sup>) T cells in live CD3<sup>+</sup> single cell lymphocytes in peripheral blood (PB) (top row) and kidney-derived MNC (bottom row) after stimulation with PMA and ionomycin for 4 hrs. (b-c) Gating strategy within CD8 (b) and CD4 (c) of (from top to bottom) TNF $\alpha$  vs IFN $\gamma$ , IL-2 vs GM-CSF and CD103 vs IL17A.

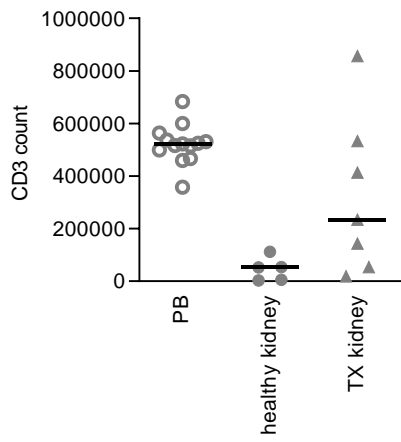

**Figure S3. CD3 cell counts**

Scatterplots of the CD3<sup>+</sup> cell counts analyzed per sample in healthy PBMCs, healthy kidney MNCs and TX kidney MNCs.

No statistical comparisons were made. The horizontal dash represents the median.

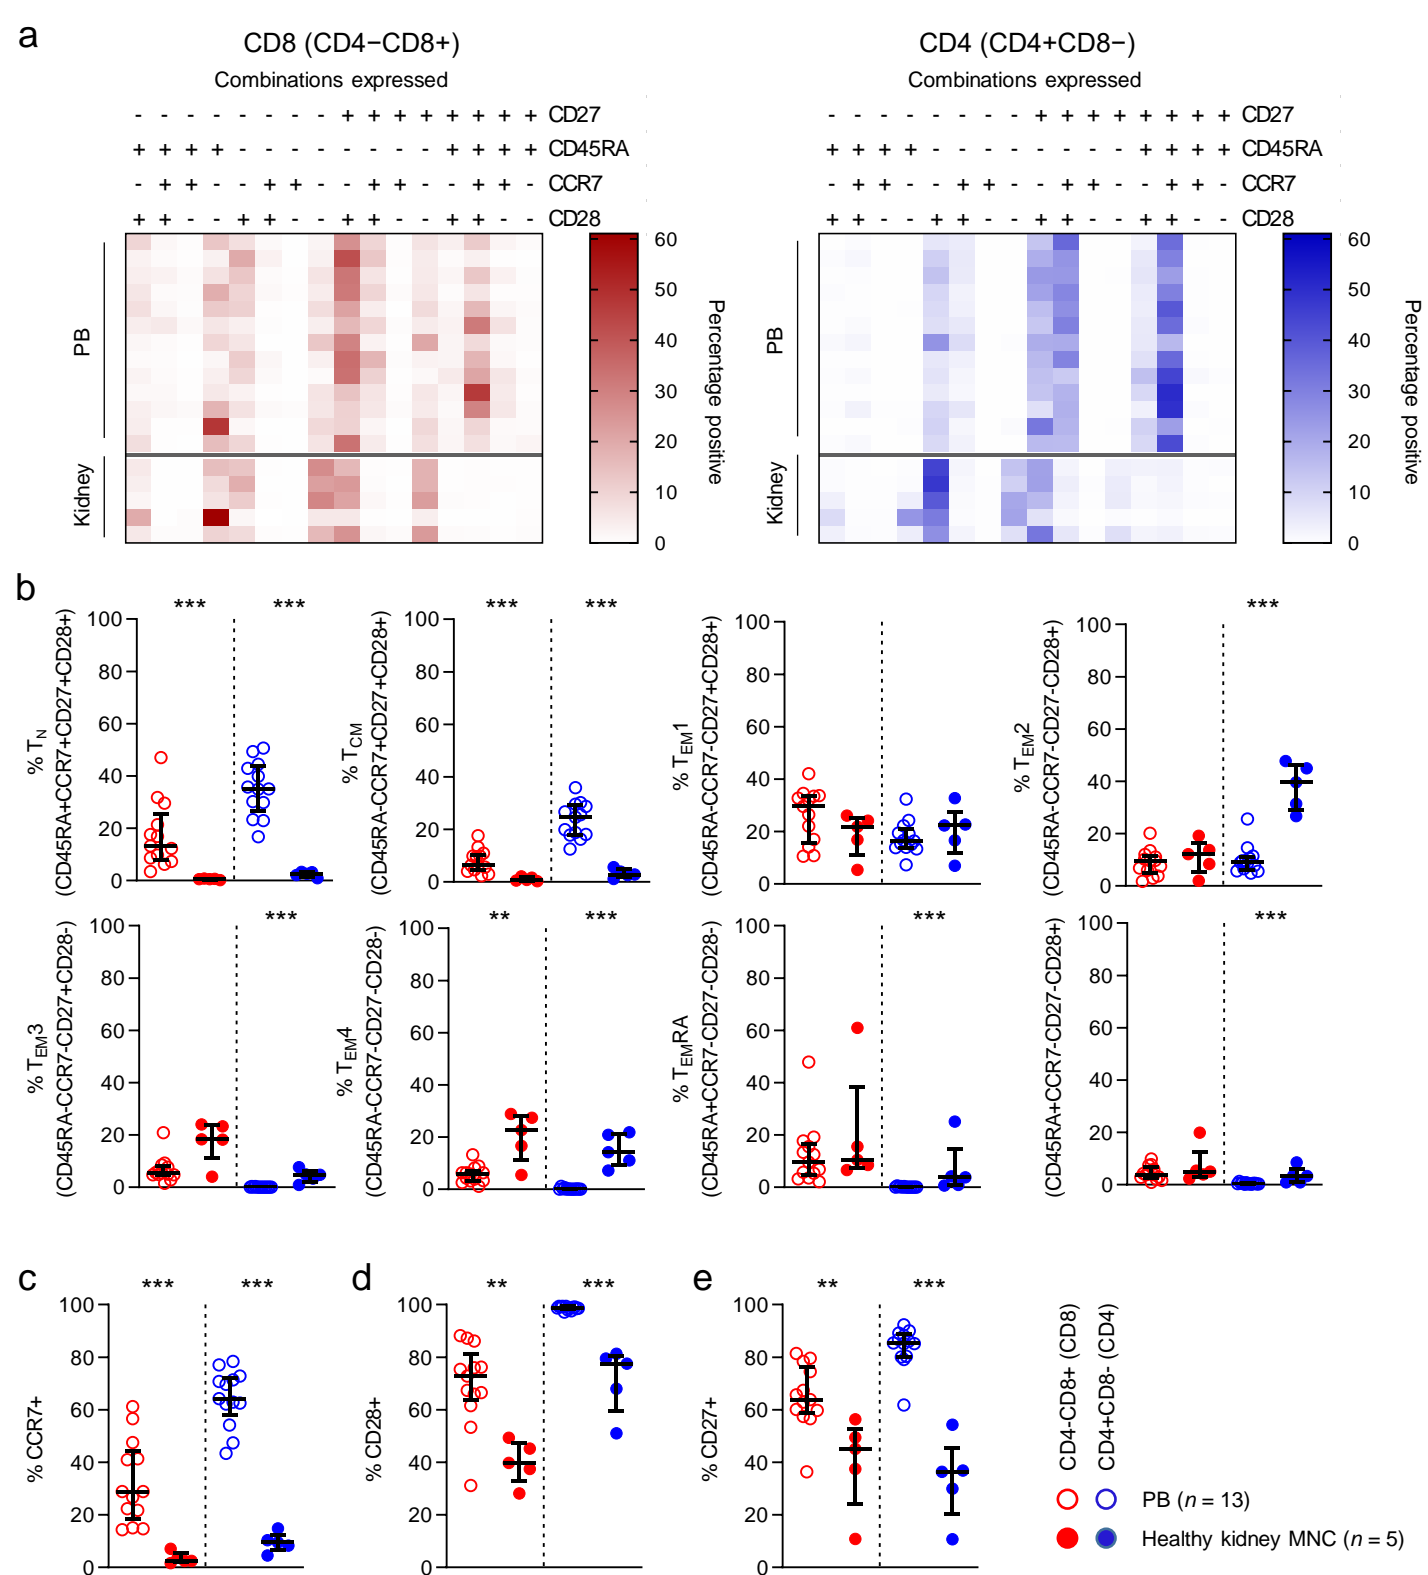

**Figure S4 (supplemental data with figures 1 and 2): Phenotype of CD8 and CD4 T cells derived from PB and healthy kidney.**  
 (a) Heatmap of the individual expression patterns of CD27, CD45RA, CCR7 and CD28 within CD8 and CD4 T cells from peripheral blood (PB) and healthy kidney. (b) Individual comparison of the 7 largest populations from heatmap a (median with IQR in black). (c-e) Comparison of total expression of CCR7 (b), CD28 (c) and CD27 (d) in CD8 (red) and CD4 (blue) T cells derived from peripheral blood (PB) and kidney (median with IQR in black). Mann-Whitney U-test was used for statistical comparison. Only significant *p*-values are displayed: \*\**p* ≤ 0.01, \*\*\**p* ≤ 0.001.



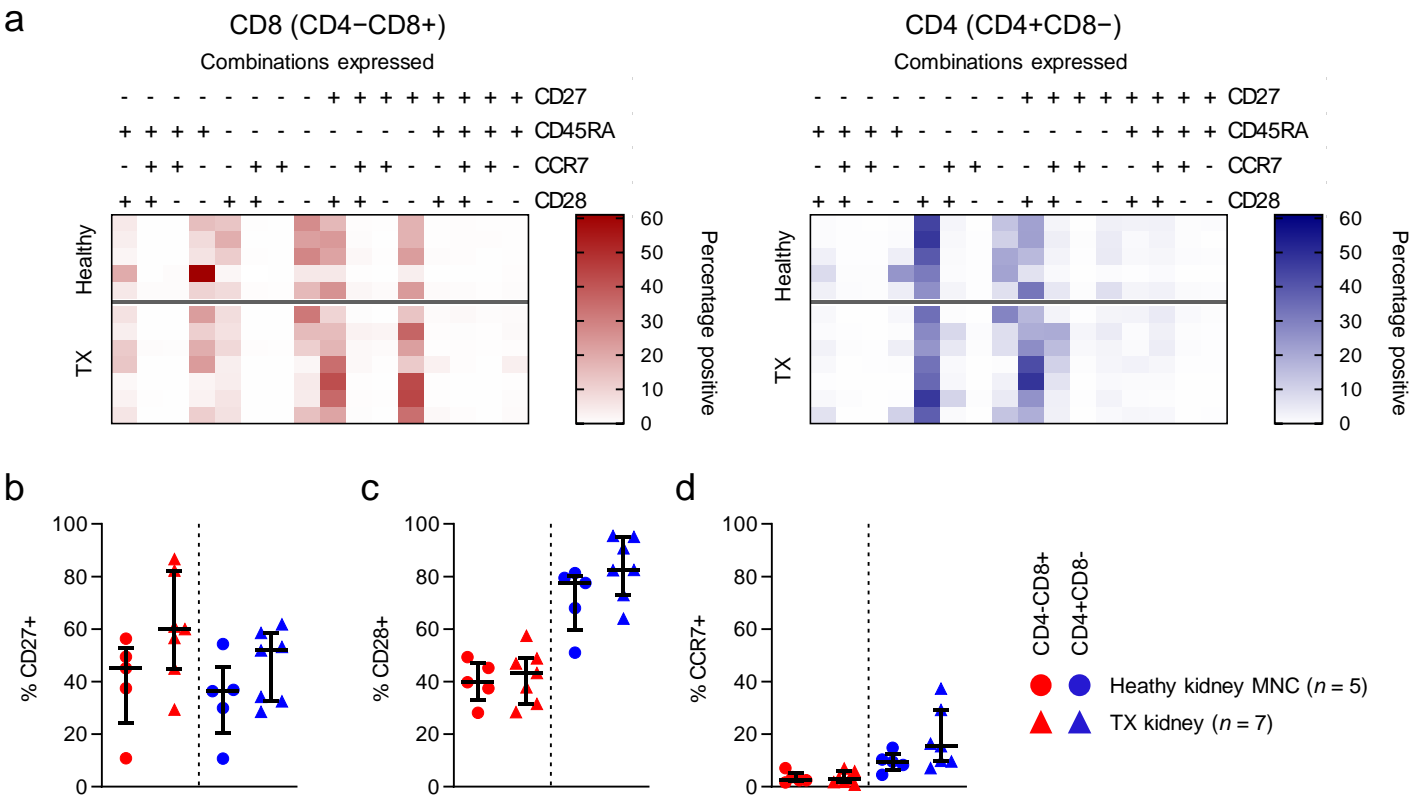

**Figure S5 (supplemental data with figure 3): CD27/CD45RA/CCR7/CD28-expression profile and phenotype of CD4 and CD8 T cells from healthy kidney compared to TX kidney.**

(a) Heatmap of the individual expression patterns of CD27, CD45RA, CCR7 and CD28 within CD4 and CD8 T cells from healthy kidney and TX (transplanted) kidney. (b–d) Comparison of expression of CD27 (b) and CD28 (c), CCR7 (d) in CD8 (red) and CD4 (blue) T cells derived from healthy kidney and TX (transplanted) kidney (median with IQR in black). Mann-Whitney U-test was used for statistical comparison. Only significant p-values are displayed: \* $p < 0.05$ , \*\* $p \leq 0.01$ , \*\*\* $p \leq 0.001$ , \*\*\*\* $p \leq 0.0001$ .

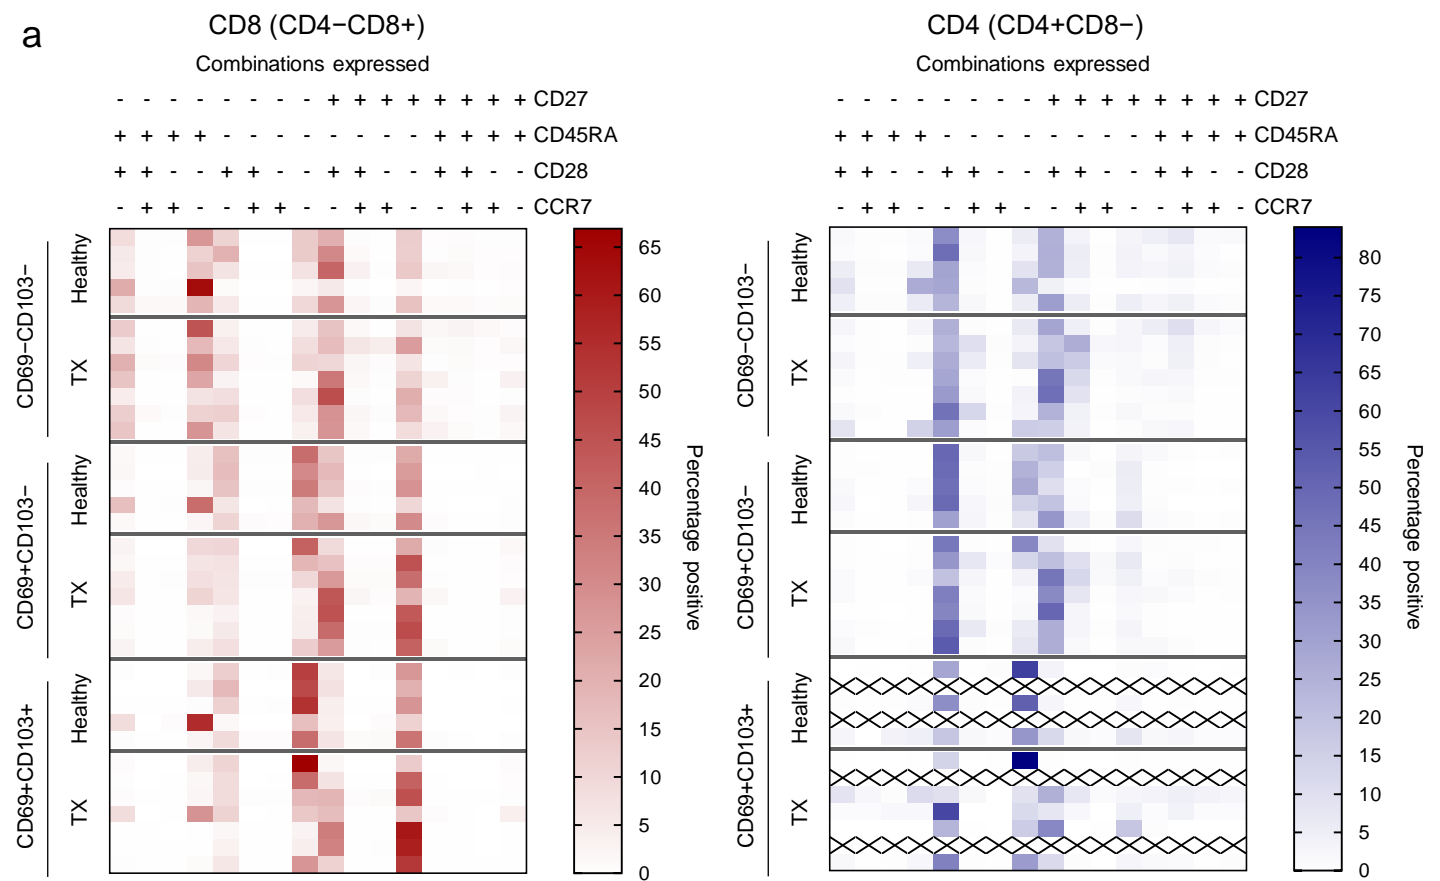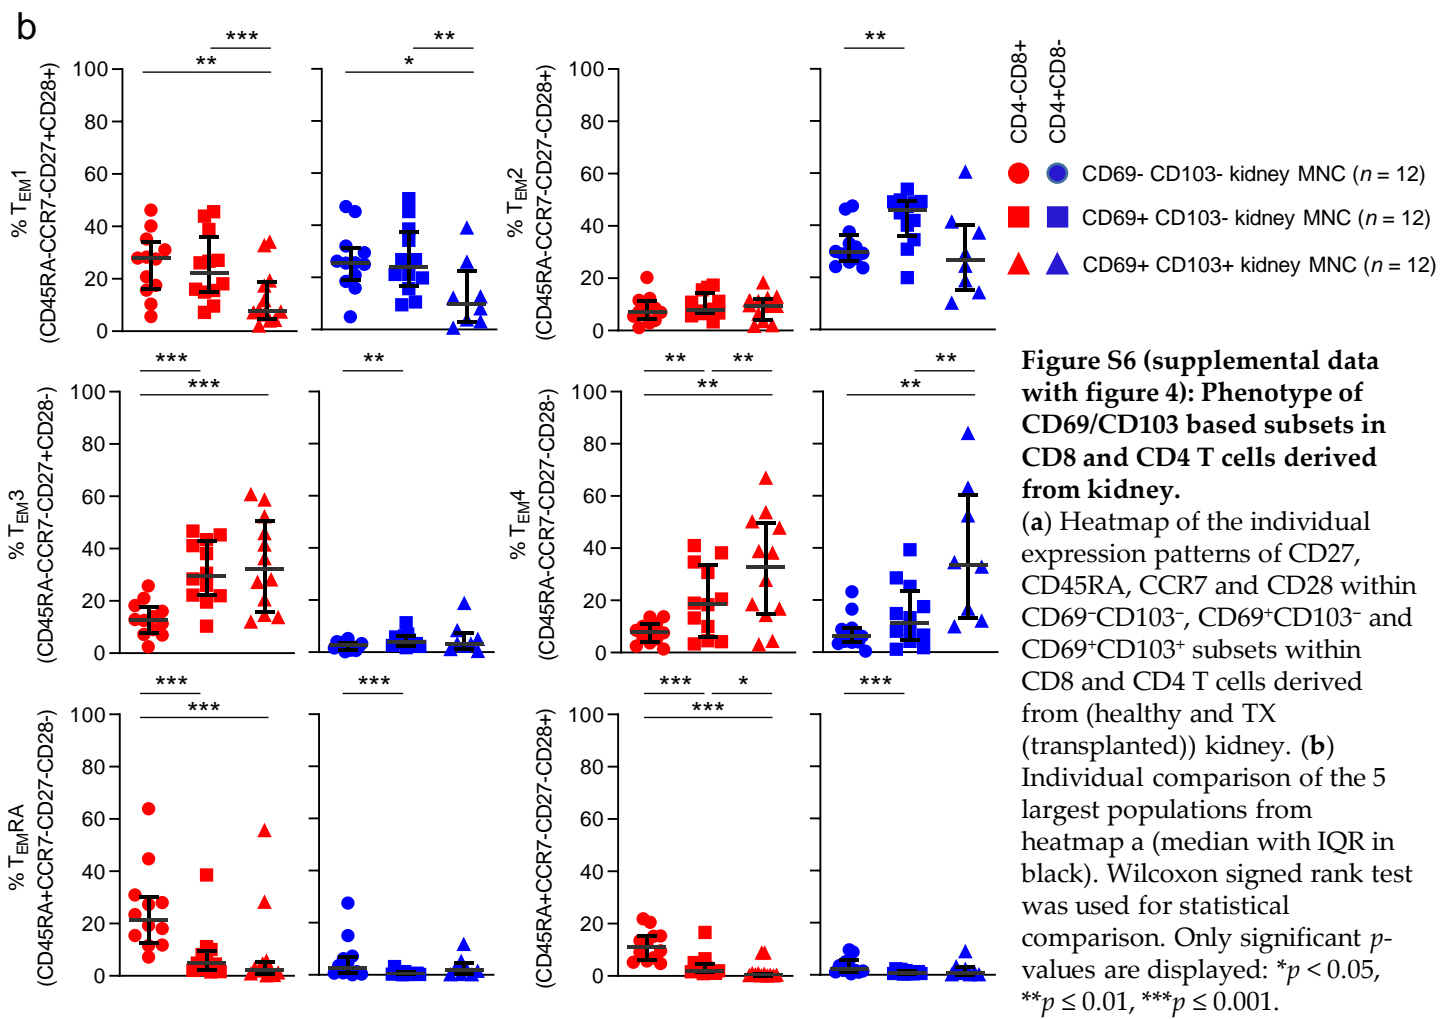

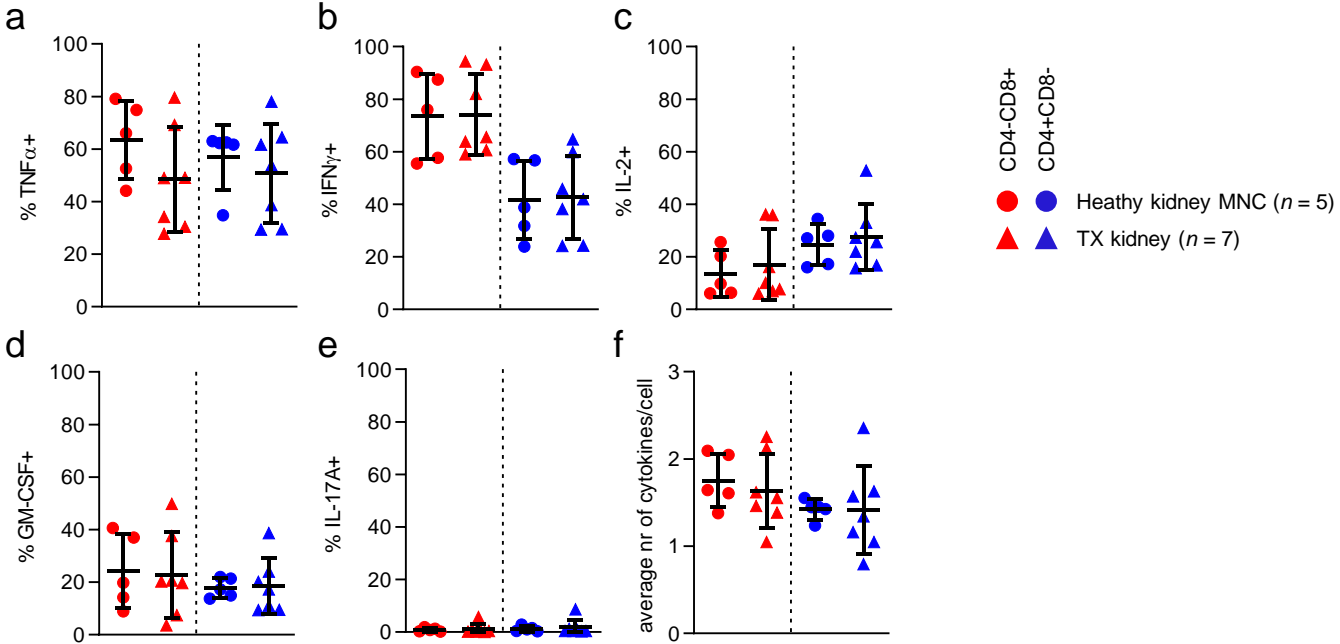

**Figure S7 (supplemental data with figure 7): Cytokines produced by healthy kidney – compared to TX kidney – derived CD8 and CD4 T cells.**  
 (a–e) Percentage of TNF $\alpha$ -(a), IFN $\gamma$ -(b), IL-2-(c), GM-CSF-(d) and IL-17A-(e) producing CD8 (red) and CD4 (blue) T cells derived from healthy and transplanted (TX) kidney after 4 hr stimulation with PMA and ionomycin (median with IQR in black). (f) The average number of cytokines produced by CD8 and CD4 T cells derived from healthy and TX kidney (median with IQR in black). Mann-Whitney U-test was used for statistical comparison. No statistical differences were found.
